# Supplementary material for: Blood and urinary metabolomic evidence validating traditional Chinese medicine diagnostic classification of major depressive disorder
Source: PubMed Central journal article supplement (PMC6203264; doi:10.1186/s13020-018-0211-z), 2018-10-25
Supplement: 13020_2018_211_MOESM1_ESM.pdf [file 13020_2018_211_MOESM1_ESM.pdf]

# 浙江省立同德医院医学伦理审查批件

伦理审查批号：浙同德伦理审字第 [ 2014 ] 009 号

|      |                                                                        |       |                           |       |  |
|------|------------------------------------------------------------------------|-------|---------------------------|-------|--|
| 项目名称 | 重性抑郁症中医辨证分型的神经化学、代谢组学和神经影像学的鉴别研究                                       |       |                           |       |  |
| 项目类别 | 临床科研                                                                   | 临床分期  | 临床验证                      | 剂型/型号 |  |
| 申办者  | 浙江省立同德医院                                                               |       |                           |       |  |
| 临床批件 |                                                                        |       |                           |       |  |
| 研究单位 | 浙江省立同德医院心身科                                                            | 项目负责人 | 刘兰英                       |       |  |
| 审查时间 | 2014 年 3 月 11 日                                                        | 会议地点  | 浙江省立同德医院 2 号楼 14 楼 2 号会议室 |       |  |
| 审查方式 | 会议审查 <input checked="" type="checkbox"/> 快速审查 <input type="checkbox"/> |       |                           |       |  |

## 伦理审查内容

|      |                                                                                                                                                                                                                                         |  |  |  |  |
|------|-----------------------------------------------------------------------------------------------------------------------------------------------------------------------------------------------------------------------------------------|--|--|--|--|
| 审查材料 | <input checked="" type="checkbox"/> 研究方案<br><input checked="" type="checkbox"/> 知情同意书<br><input type="checkbox"/> 临床观察表<br><input type="checkbox"/> 研究者手册<br><input type="checkbox"/> 研究者资质:参见项目组研究人员履历表<br><input type="checkbox"/> 其他 |  |  |  |  |
| 投票结果 | 应到委员人数 13 人, 实到 12 人, 其中: 投票人数 12 人, 回避人数 0 人<br>结果: 同意 12 票; 作必要修正后同意 0 票; 作必要修正后重审 0 票;<br>不同意 0 票; 终止或暂停已批准的试验 0 票                                                                                                                   |  |  |  |  |
| 审查结论 | <input checked="" type="checkbox"/> 同意 <input type="checkbox"/> 作必要修正后同意<br><input type="checkbox"/> 作必要修正后重审 <input type="checkbox"/> 不同意<br><input type="checkbox"/> 终止或暂停已批准的试验                                                      |  |  |  |  |

## 审批意见:

根据投票结果, 本委员会同意自审批之日起开展该项试验, 要求研究者和申报者严格遵守中国 (GCP)、自觉接受国家有关法律和法规约束, 注意防范不良事件, 保护受试者权益和安全。研究过程中注意事项:

1. 修改方案、知情同意书和招募材料等应报伦理委员会审查批准后执行;
2. 若自同意研究之日起, 一年内尚未完成研究, 应每年向本委员会提交年度/定期跟踪审查报告;
3. 试验过程中发生以下情况应及时报告: ①发生任何严重不良事件请立即 24 小时内报告; ②违反研究方案; ③暂停/终止研究;
4. 研究完成后提交总结报告。

主任委员 (签字):

日期: 2014 年 3 月 11 日

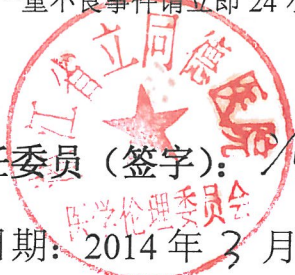

本次伦理委员会出席会议的委员情况

|                  |                     |        |                                                                                       |
|------------------|---------------------|--------|---------------------------------------------------------------------------------------|
| 伦理审查会议编号：2014-02 |                     |        |                                                                                       |
| 伦理审查时间           | 2014年3月11日          |        |                                                                                       |
| 伦理审查地点           | 浙江省立同德医院2号楼14楼2号会议室 |        |                                                                                       |
| 姓名               | 性别                  | 专业基本情况 | 签名                                                                                    |
| 柴可群              | 男                   | 中医内科   | 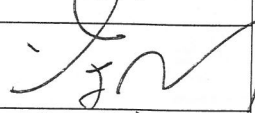   |
| 冯斌               | 男                   | 精神科    |    |
| 陈勇毅              | 男                   | 中医老年病  |    |
| 王乃信              | 男                   | 精神科    |    |
| 李亚平              | 男                   | 中医心血管  |   |
| 黄飞华              | 男                   | 中医内科   |  |
| 裘维焰              | 男                   | 中医     |  |
| 张春               | 男                   | 骨伤     |  |
| 谢培怡              | 女                   | 心血管    |  |
| 蒋坤庭              | 男                   | 社区代表   |  |
| 王凤扬              | 男                   | 法律     |  |
| 徐东娥              | 女                   | 护理     |  |
| 周国仁              | 男                   | 社区代表   |  |
